# Supplementary material for: Development of a post-synthetic method for tuning the Al content of OSDA-free Beta as a catalyst for conversion of methanol to olefins
Source: Royal Society of Chemistry journal article supplement (doi:10.1039/c5cy00944h), 2015-08-20
Supplement: c5cy00944h1.pdf [file c5cy00944h1.pdf]

## *Supporting Information*

### **Development of post-synthetic method for tuning Al content of OSDA-free Beta as catalyst for conversion of methanol to olefins**

Ryoichi Otomo,<sup>a</sup> Ulrich Müller,<sup>b</sup> Mathias Feyen,<sup>b</sup> Bilge Yilmaz,<sup>c</sup> Xiangju Meng,<sup>d</sup> Feng-Shou Xiao,<sup>d</sup>  
Hermann Gies,<sup>e</sup> Xinhe Bao,<sup>f</sup> Weiping Zhang,<sup>g</sup> Dirk De Vos,<sup>h</sup> Toshiyuki Yokoi<sup>a, \*</sup>

<sup>a</sup>Chemical Resources Laboratory, Tokyo Institute of Technology, 4259 Nagatsuta, Midori-ku,  
Yokohama 226-8503, Japan.

<sup>b</sup>Chemicals Research and Engineering, BASF SE, 67056 Ludwigshafen, Germany.

<sup>c</sup>Chemicals Research and Engineering, BASF Corporation, NJ 08830, USA.

<sup>d</sup>Key Lab of Applied Chemistry of Zhejiang Province, Department of Chemistry, Zhejiang  
University, Hangzhou 310028, China.

<sup>e</sup>Institute of Geology, Mineralogy and Geophysics, Ruhr-University Bochum, 44780, Bochum,  
Germany.

<sup>f</sup>State Key Laboratory of Catalysis, Dalian Institute of Chemical Physics, Dalian, China.

<sup>g</sup>State Key Laboratory of Fine Chemicals, Dalian University of Technology, Dalian, China.

<sup>h</sup>Centre for Surface Chemistry and Catalysis, K.U. Leuven, Leuven, Belgium.

*\*Corresponding author: Toshiyuki Yokoi*

Tel: +81-45-924-5265, Fax: +81-45-924-5282, E-mail: yokoi@cat.res.titech.ac.jp

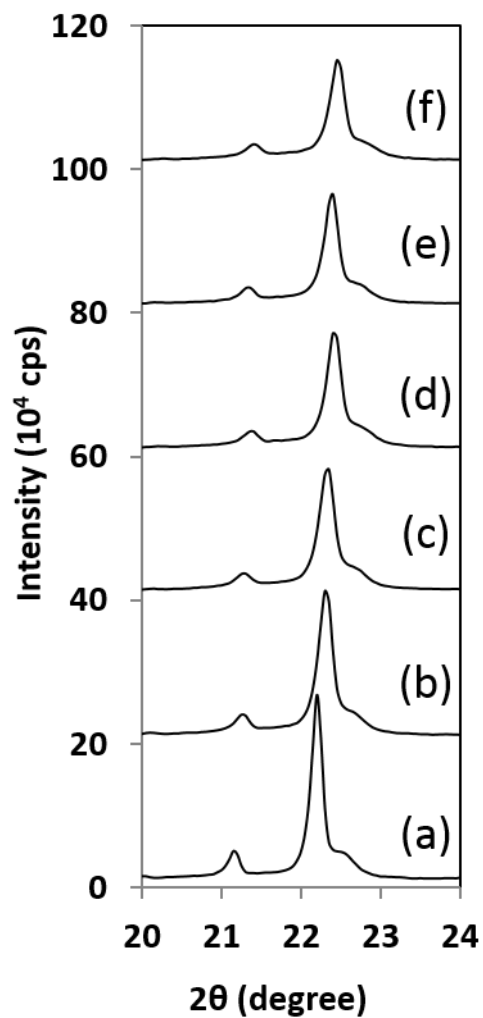

**Fig. S1** XRD patterns around  $22^\circ$  of calcined Beta(OF) zeolites.  
(a) Beta(OF)-NH<sub>4</sub>, (b) Cal650-5h, (c) Cal700-5h, (d) Cal750-5h, (e) Cal750-15h, and (f) Cal800-24h.

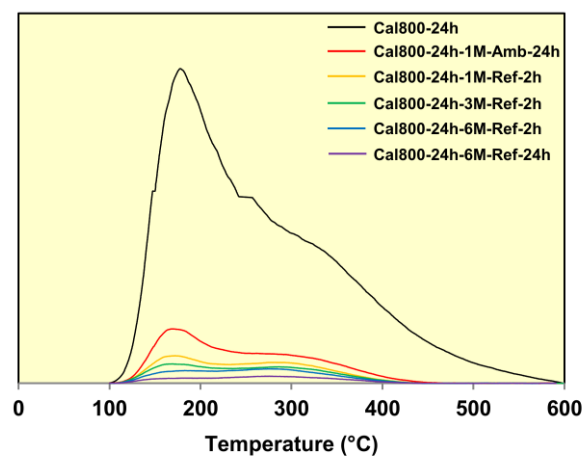

**Fig. S2** NH<sub>3</sub>-TPD profiles of Cal800-24h and its acid-treated catalysts.

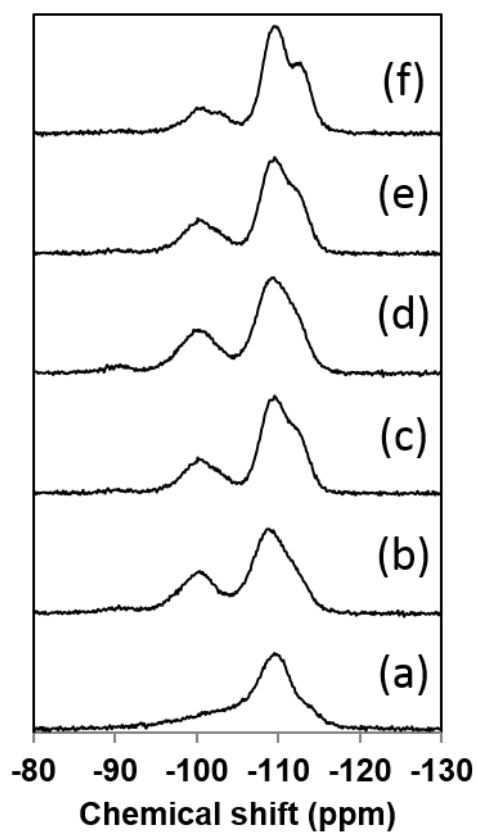

**Fig. S3**  $^{29}\text{Si}$  MAS NMR spectra of acid-treated Cal800-24h.  
(a) Cal800-24h, (b) Cal800-24h-1M-Amb-24h, (c) Cal800-24h-1M-Ref-2h, (d) Cal800-24h-3M-Ref-2h, (e) Cal800-24h-6M-Ref-2h, and (f) Cal800-24h-6M-Ref-24h.
